# Supplementary material for: Measuring Meiotic Crossovers via Multi-Locus Genotyping of Single Pollen Grains in Barley
Source: PLoS One. 2015 Sep 10;10(9):e0137677. doi: 10.1371/journal.pone.0137677 (PMC4565660; doi:10.1371/journal.pone.0137677)
Supplement: S4 Table — Actual data referring to Figs 2, 3, 4 and S5, S6 Figs are summarized in separate tables. (XLSX) [file pone.0137677.s006.xlsx]

## Sheet: Figure 2
Sample ID	Genotyping call rate	Preselection PCR call rate
M	1	1
B	1	1
MxB F1	1	1
M pollen #1	0.68	0.125
M pollen #2	0.875	1
S100	1	0.875
S101	0.75	0.5
S109	0.291667	0.375
S111	0.291667	0.375
S117	0.875	0.375
S121	0.666667	0.75
S125	0.416667	0.375
S129	0.375	0.5
S131	0.375	0.375
S132	0.708333	0.375
S133	0.916667	0.375
S135	0.833333	0.75
S136	0.958333	0.5
S137	0.708333	0.75
S143	0.375	0.375
S145	0.416667	0.375
S146	0.541667	0.375
S147	0.75	0.375
S148	0.916667	0.875
S149	0.291667	0.625
S150	0.958333	0.5
S151	0.958333	0.625
S152	0.791667	0.625
S153	0.708333	0.375
S154	0.875	0.5
S155	0.541667	0.75
S158	0.458333	0.375
S159	0.666667	0.375
S163	0.875	0.875
S164	0.958333	0.75
S165	0.875	0.875
S166	1	0.75
S168	0.541667	0.375
S169	0.5	0.5
S170	0.833333	0.375
S172	0.625	0.375
S173	0.416667	0.625
S175	0.666667	0.5
S176	0.375	0.5
S178	0.666667	0.625
S180	1	0.625
S181	0.666667	0.375
S182	0.875	0.625
S183	0.833333	0.5
S184	0.958333	0.875
S185	0.916667	0.5
S186	0.875	1
S188	0.916667	0.625
S191	0.916667	0.875
S95	0.375	0.375

## Sheet: Figure 3
Number of crossovers	Relative frequency (MxB pollen population)	Relative frequency (MxB DH population)
0	0.1	0.101124
1	0.38	0.280899
2	0.24	0.359551
3	0.14	0.202247
4	0.08	0.0449438
5	0.04	0.011236
6	0.02	0

## Sheet: Figure 4
Marker pair	Recombination frequency
A-B	0.0357143
B-C	0.16129
C-D	0.129032
D-E	0.571429
E-F	0
F-G	0.03125
G-H	0
H-I	0.0294118
I-J	0.15625
J-K	0
K-L	0.0333333
L-M	0
M-N	0
N-O	0.0606061
O-P	0.114286
P-Q	0.0277778
Q-R	0.030303
R-S	0.166667
S-T	0.0909091
T-U	0
U-V	0.103448
V-W	0.142857
W-X	0.16

## Sheet: Figure S3
Sample ID	Number of positive PCR marker
M	8
B	8
MxB F1	8
M pollen #1	1
M pollen #2	8
S100	7
S101	4
S109	3
S111	3
S117	3
S121	6
S125	3
S129	4
S131	3
S132	3
S133	3
S135	6
S136	4
S137	6
S143	3
S145	3
S146	3
S147	3
S148	7
S149	5
S150	4
S151	5
S152	5
S153	3
S154	4
S155	6
S158	3
S159	3
S163	7
S164	6
S165	7
S166	6
S168	3
S169	4
S170	3
S172	3
S173	5
S175	4
S176	4
S178	5
S180	5
S181	3
S182	5
S183	4
S184	7
S185	4
S186	8
S188	5
S191	7
S95	3

## Sheet: Figure S5
KASP marker	Marker call rate	Relative frequency of double CO
A	0.66	0
B	0.68	0.02
C	0.72	0.02
D	0.78	0
E	0.68	0.02
F	0.8	0
G	0.7	0
H	0.64	0
I	0.82	0
J	0.76	0
K	0.58	0
L	0.68	0
M	0.6	0
N	0.78	0.02
O	0.84	0
P	0.74	0
Q	0.72	0
R	0.64	0.02
S	0.74	0.04
T	0.7	0
U	0.6	0
V	0.64	0
W	0.72	0.04
X	0.62	0
